# Supplementary material for: Synthetic O-acetylated sialosides facilitate functional receptor identification for human respiratory viruses
Source: Springer Nature journal article supplement (doi:10.1038/s41557-021-00655-9), 2021-03-22
Supplement: 41557_2021_655_MOESM5_ESM.mol [file 41557_2021_655_MOESM5_ESM.mol]

nchem.20061559B-comp1d.mol
  ChemDraw02032100322D

 83 87  0  0  1  0  0  0  0  0999 V2000
   -8.7133    3.0151    0.0000 C   0  0  0  0  0  0  0  0  0  0  0  0
   -7.9958    2.6079    0.0000 C   0  0  0  0  0  0  0  0  0  0  0  0
   -7.9863    1.7830    0.0000 C   0  0  0  0  0  0  0  0  0  0  0  0
   -7.2721    1.3700    0.0000 C   0  0  0  0  0  0  0  0  0  0  0  0
   -6.5675    1.7820    0.0000 C   0  0  0  0  0  0  0  0  0  0  0  0
   -6.5619    2.5983    0.0000 C   0  0  0  0  0  0  0  0  0  0  0  0
   -7.2761    3.0112    0.0000 O   0  0  0  0  0  0  0  0  0  0  0  0
   -5.8459    3.0081    0.0000 O   0  0  0  0  0  0  0  0  0  0  0  0
   -5.1288    3.4160    0.0000 C   0  0  0  0  0  0  0  0  0  0  0  0
   -4.4176    2.9978    0.0000 C   0  0  0  0  0  0  0  0  0  0  0  0
   -3.7018    3.4079    0.0000 C   0  0  0  0  0  0  0  0  0  0  0  0
   -3.6971    4.2362    0.0000 C   0  0  0  0  0  0  0  0  0  0  0  0
   -4.4140    4.6511    0.0000 O   0  0  0  0  0  0  0  0  0  0  0  0
   -5.1299    4.2410    0.0000 C   0  0  0  0  0  0  0  0  0  0  0  0
   -5.8439    4.6542    0.0000 C   0  0  0  0  0  0  0  0  0  0  0  0
   -5.8430    5.4792    0.0000 O   0  0  0  0  0  0  0  0  0  0  0  0
   -7.2702    0.5450    0.0000 O   0  0  0  0  0  0  0  0  0  0  0  0
   -8.6985    1.3666    0.0000 O   0  0  0  0  0  0  0  0  0  0  0  0
   -5.8533    1.3691    0.0000 O   0  0  0  0  0  0  0  0  0  0  0  0
   -4.4223    2.0964    0.0000 O   0  0  0  0  0  0  0  0  0  0  0  0
   -2.9510    2.9922    0.0000 N   0  0  0  0  0  0  0  0  0  0  0  0
   -2.9813    4.6463    0.0000 O   0  0  0  0  0  0  0  0  0  0  0  0
   -2.2682    4.2314    0.0000 C   0  0  0  0  0  0  0  0  0  0  0  0
   -1.5524    4.6415    0.0000 C   0  0  0  0  0  0  0  0  0  0  0  0
   -0.8393    4.2266    0.0000 C   0  0  0  0  0  0  0  0  0  0  0  0
   -0.1234    4.6367    0.0000 C   0  0  0  0  0  0  0  0  0  0  0  0
    0.5897    4.2218    0.0000 C   0  0  0  0  0  0  0  0  0  0  0  0
    1.3055    4.6319    0.0000 N   0  0  0  0  0  0  0  0  0  0  0  0
   -9.4278    2.6026    0.0000 O   0  0  0  0  0  0  0  0  0  0  0  0
   -9.4307   -1.7498    0.0000 C   0  0  0  0  0  0  0  0  0  0  0  0
   -8.7130   -2.1566    0.0000 C   0  0  0  0  0  0  0  0  0  0  0  0
   -8.0018   -1.7384    0.0000 C   0  0  0  0  0  0  0  0  0  0  0  0
   -8.0084   -0.9134    0.0000 C   0  0  0  0  0  0  0  0  0  0  0  0
   -8.7261   -0.5066    0.0000 C   0  0  0  0  0  0  0  0  0  0  0  0
   -9.4373   -0.9248    0.0000 O   0  0  0  0  0  0  0  0  0  0  0  0
  -10.1419   -2.1680    0.0000 C   0  0  0  0  0  0  0  0  0  0  0  0
  -10.1353   -2.9929    0.0000 C   0  0  0  0  0  0  0  0  0  0  0  0
  -10.8596   -1.7612    0.0000 O   0  0  0  0  0  0  0  0  0  0  0  0
  -10.8465   -3.4111    0.0000 C   0  0  0  0  0  0  0  0  0  0  0  0
   -9.4176   -3.3997    0.0000 O   0  0  0  0  0  0  0  0  0  0  0  0
  -10.8399   -4.2361    0.0000 O   0  0  0  0  0  0  0  0  0  0  0  0
   -8.7064   -2.9816    0.0000 N   0  0  0  0  0  0  0  0  0  0  0  0
   -7.2841   -2.1452    0.0000 O   0  0  0  0  0  0  0  0  0  0  0  0
   -9.3141    0.0721    0.0000 C   0  0  0  0  0  0  0  0  0  0  0  0
  -10.1092   -0.1478    0.0000 O   0  0  0  0  0  0  0  0  0  0  0  0
   -9.0305    0.7178    0.0000 O   0  0  0  0  0  0  0  0  0  0  0  0
   -7.9887   -3.3884    0.0000 C   0  0  0  0  0  0  0  0  0  0  0  0
   -7.2775   -2.9702    0.0000 O   0  0  0  0  0  0  0  0  0  0  0  0
   -7.9821   -4.2133    0.0000 C   0  0  0  0  0  0  0  0  0  0  0  0
  -11.5708   -2.1793    0.0000 C   0  0  0  0  0  0  0  0  0  0  0  0
  -12.2885   -1.7725    0.0000 O   0  0  0  0  0  0  0  0  0  0  0  0
  -11.5642   -3.0043    0.0000 C   0  0  0  0  0  0  0  0  0  0  0  0
    2.0186    4.2171    0.0000 C   0  0  0  0  0  0  0  0  0  0  0  0
    2.7345    4.6272    0.0000 C   0  0  0  0  0  0  0  0  0  0  0  0
    3.4475    4.2123    0.0000 C   0  0  0  0  0  0  0  0  0  0  0  0
    4.1634    4.6224    0.0000 C   0  0  0  0  0  0  0  0  0  0  0  0
    4.8765    4.2075    0.0000 C   0  0  0  0  0  0  0  0  0  0  0  0
    5.5923    4.6176    0.0000 C   0  0  0  0  0  0  0  0  0  0  0  0
    2.0158    3.3921    0.0000 O   0  0  0  0  0  0  0  0  0  0  0  0
    6.3054    4.2027    0.0000 N   0  0  0  0  0  0  0  0  0  0  0  0
   -2.9362    2.1673    0.0000 C   0  0  0  0  0  0  0  0  0  0  0  0
   -3.6432    1.7421    0.0000 O   0  0  0  0  0  0  0  0  0  0  0  0
   -2.2144    1.7677    0.0000 C   0  0  0  0  0  0  0  0  0  0  0  0
  -11.5511   -4.6542    0.0000 C   0  0  0  0  0  0  0  0  0  0  0  0
  -11.5445   -5.4792    0.0000 C   0  0  0  0  0  0  0  0  0  0  0  0
  -12.2688   -4.2474    0.0000 O   0  0  0  0  0  0  0  0  0  0  0  0
    7.0213    4.6128    0.0000 C   0  0  0  0  0  0  0  0  0  0  0  0
    7.7343    4.1979    0.0000 C   0  0  0  0  0  0  0  0  0  0  0  0
    7.0240    5.4378    0.0000 O   0  0  0  0  0  0  0  0  0  0  0  0
    8.4502    4.6080    0.0000 C   0  0  0  0  0  0  0  0  0  0  0  0
    9.1633    4.1932    0.0000 C   0  0  0  0  0  0  0  0  0  0  0  0
    9.8791    4.6033    0.0000 C   0  0  0  0  0  0  0  0  0  0  0  0
   10.5922    4.1884    0.0000 C   0  0  0  0  0  0  0  0  0  0  0  0
   10.6757    3.3676    0.0000 C   0  0  0  0  0  0  0  0  0  0  0  0
   11.4821    3.1934    0.0000 C   0  0  0  0  0  0  0  0  0  0  0  0
   11.8970    3.9065    0.0000 C   0  0  0  0  0  0  0  0  0  0  0  0
   11.3470    4.5214    0.0000 S   0  0  0  0  0  0  0  0  0  0  0  0
   10.2608    2.6545    0.0000 N   0  0  0  0  0  0  0  0  0  0  0  0
   10.8108    2.0396    0.0000 C   0  0  0  0  0  0  0  0  0  0  0  0
   11.5656    2.3726    0.0000 N   0  0  0  0  0  0  0  0  0  0  0  0
   10.6366    1.2332    0.0000 O   0  0  0  0  0  0  0  0  0  0  0  0
    9.8693    3.5418    0.0000 H   0  0  0  0  0  0  0  0  0  0  0  0
   12.2885    3.0192    0.0000 H   0  0  0  0  0  0  0  0  0  0  0  0
  2  1  1  1      
  2  3  1  0      
  3  4  1  0      
  4  5  1  0      
  5  6  1  0      
  6  7  1  0      
  7  2  1  0      
  6  8  1  1      
  9  8  1  6      
  9 10  1  0      
 10 11  1  0      
 11 12  1  0      
 12 13  1  0      
 13 14  1  0      
 14  9  1  0      
 14 15  1  1      
 15 16  1  0      
  4 17  1  1      
  3 18  1  1      
  5 19  1  6      
 10 20  1  1      
 11 21  1  6      
 12 22  1  1      
 22 23  1  0      
 23 24  1  0      
 24 25  1  0      
 25 26  1  0      
 26 27  1  0      
 27 28  1  0      
  1 29  1  0      
 30 31  1  0      
 31 32  1  0      
 32 33  1  0      
 33 34  1  0      
 34 35  1  0      
 30 35  1  6      
 30 36  1  0      
 36 37  1  0      
 36 38  1  1      
 37 40  1  6      
 39 41  1  0      
 31 42  1  1      
 32 43  1  6      
 34 44  1  1      
 44 45  2  0      
 44 46  1  0      
 34 17  1  6      
 39 37  1  0      
 42 47  1  0      
 47 48  2  0      
 47 49  1  0      
 38 50  1  0      
 50 51  2  0      
 50 52  1  0      
 28 53  1  0      
 53 54  1  0      
 54 55  1  0      
 55 56  1  0      
 56 57  1  0      
 57 58  1  0      
 53 59  2  0      
 58 60  1  0      
 21 61  1  0      
 61 62  2  0      
 61 63  1  0      
 41 64  1  0      
 64 65  1  0      
 64 66  2  0      
 60 67  1  0      
 67 68  1  0      
 67 69  2  0      
 68 70  1  0      
 70 71  1  0      
 71 72  1  0      
 73 72  1  6      
 73 74  1  0      
 74 75  1  0      
 75 76  1  0      
 76 77  1  0      
 77 73  1  0      
 74 78  1  0      
 78 79  1  0      
 79 80  1  0      
 80 75  1  0      
 79 81  2  0      
 74 82  1  1      
 75 83  1  1      
M  END
