# Supplementary material for: Synthetic O-acetylated sialosides facilitate functional receptor identification for human respiratory viruses
Source: Springer Nature journal article supplement (doi:10.1038/s41557-021-00655-9), 2021-03-22
Supplement: 41557_2021_655_MOESM41_ESM.mol [file 41557_2021_655_MOESM41_ESM.mol]

nchem.20061559B-comp13.mol
  ChemDraw02032100322D

110119  0  0  1  0  0  0  0  0999 V2000
   -6.0859    2.3960    0.0000 C   0  0  0  0  0  0  0  0  0  0  0  0
   -5.3684    1.9888    0.0000 C   0  0  0  0  0  0  0  0  0  0  0  0
   -5.3589    1.1638    0.0000 C   0  0  0  0  0  0  0  0  0  0  0  0
   -4.6448    0.7509    0.0000 C   0  0  0  0  0  0  0  0  0  0  0  0
   -3.9402    1.1629    0.0000 C   0  0  0  0  0  0  0  0  0  0  0  0
   -3.9346    1.9791    0.0000 C   0  0  0  0  0  0  0  0  0  0  0  0
   -4.6487    2.3921    0.0000 O   0  0  0  0  0  0  0  0  0  0  0  0
   -3.2186    2.3889    0.0000 O   0  0  0  0  0  0  0  0  0  0  0  0
   -2.5015    2.7968    0.0000 C   0  0  0  0  0  0  0  0  0  0  0  0
   -1.7903    2.3787    0.0000 C   0  0  0  0  0  0  0  0  0  0  0  0
   -1.0744    2.7888    0.0000 C   0  0  0  0  0  0  0  0  0  0  0  0
   -1.0698    3.6170    0.0000 C   0  0  0  0  0  0  0  0  0  0  0  0
   -1.7867    4.0319    0.0000 O   0  0  0  0  0  0  0  0  0  0  0  0
   -2.5025    3.6218    0.0000 C   0  0  0  0  0  0  0  0  0  0  0  0
   -3.2165    4.0351    0.0000 C   0  0  0  0  0  0  0  0  0  0  0  0
   -3.2157    4.8601    0.0000 O   0  0  0  0  0  0  0  0  0  0  0  0
   -4.6428   -0.0741    0.0000 O   0  0  0  0  0  0  0  0  0  0  0  0
   -6.0712    0.7475    0.0000 O   0  0  0  0  0  0  0  0  0  0  0  0
   -3.2260    0.7499    0.0000 O   0  0  0  0  0  0  0  0  0  0  0  0
   -1.7949    1.4773    0.0000 O   0  0  0  0  0  0  0  0  0  0  0  0
   -0.3236    2.3731    0.0000 N   0  0  0  0  0  0  0  0  0  0  0  0
   -0.3539    4.0271    0.0000 O   0  0  0  0  0  0  0  0  0  0  0  0
    0.3592    3.6123    0.0000 C   0  0  0  0  0  0  0  0  0  0  0  0
    1.0750    4.0224    0.0000 C   0  0  0  0  0  0  0  0  0  0  0  0
    1.7881    3.6075    0.0000 C   0  0  0  0  0  0  0  0  0  0  0  0
    2.5039    4.0176    0.0000 C   0  0  0  0  0  0  0  0  0  0  0  0
    3.2170    3.6027    0.0000 C   0  0  0  0  0  0  0  0  0  0  0  0
    3.9329    4.0128    0.0000 N   0  0  0  0  0  0  0  0  0  0  0  0
   -0.9300    0.9843    0.0000 C   0  0  0  0  0  0  0  0  0  0  0  0
   -3.2265   -0.0751    0.0000 C   0  0  0  0  0  0  0  0  0  0  0  0
   -3.8337   -0.6337    0.0000 C   0  0  0  0  0  0  0  0  0  0  0  0
   -3.9297    5.2733    0.0000 C   0  0  0  0  0  0  0  0  0  0  0  0
   -3.9289    6.0983    0.0000 C   0  0  0  0  0  0  0  0  0  0  0  0
   -3.2140    6.5101    0.0000 C   0  0  0  0  0  0  0  0  0  0  0  0
   -3.2131    7.3351    0.0000 C   0  0  0  0  0  0  0  0  0  0  0  0
   -3.9271    7.7483    0.0000 C   0  0  0  0  0  0  0  0  0  0  0  0
   -4.6420    7.3366    0.0000 C   0  0  0  0  0  0  0  0  0  0  0  0
   -4.6429    6.5116    0.0000 C   0  0  0  0  0  0  0  0  0  0  0  0
   -0.9601    0.1265    0.0000 C   0  0  0  0  0  0  0  0  0  0  0  0
   -0.2510   -0.2953    0.0000 C   0  0  0  0  0  0  0  0  0  0  0  0
   -0.2617   -1.1202    0.0000 C   0  0  0  0  0  0  0  0  0  0  0  0
   -0.9815   -1.5234    0.0000 C   0  0  0  0  0  0  0  0  0  0  0  0
   -1.6905   -1.1017    0.0000 C   0  0  0  0  0  0  0  0  0  0  0  0
   -1.6798   -0.2767    0.0000 C   0  0  0  0  0  0  0  0  0  0  0  0
   -4.6209   -0.3869    0.0000 C   0  0  0  0  0  0  0  0  0  0  0  0
   -5.2282   -0.9452    0.0000 C   0  0  0  0  0  0  0  0  0  0  0  0
   -5.0470   -1.7508    0.0000 C   0  0  0  0  0  0  0  0  0  0  0  0
   -4.2595   -1.9968    0.0000 C   0  0  0  0  0  0  0  0  0  0  0  0
   -3.6519   -1.4376    0.0000 C   0  0  0  0  0  0  0  0  0  0  0  0
   -6.8004    1.9835    0.0000 O   0  0  0  0  0  0  0  0  0  0  0  0
   -6.8033   -2.3689    0.0000 C   0  0  0  0  0  0  0  0  0  0  0  0
   -6.0856   -2.7757    0.0000 C   0  0  0  0  0  0  0  0  0  0  0  0
   -5.3744   -2.3576    0.0000 C   0  0  0  0  0  0  0  0  0  0  0  0
   -5.3810   -1.5326    0.0000 C   0  0  0  0  0  0  0  0  0  0  0  0
   -6.0987   -1.1258    0.0000 C   0  0  0  0  0  0  0  0  0  0  0  0
   -6.8099   -1.5440    0.0000 O   0  0  0  0  0  0  0  0  0  0  0  0
   -7.5145   -2.7871    0.0000 C   0  0  0  0  0  0  0  0  0  0  0  0
   -7.5079   -3.6121    0.0000 C   0  0  0  0  0  0  0  0  0  0  0  0
   -8.2322   -2.3803    0.0000 O   0  0  0  0  0  0  0  0  0  0  0  0
   -8.2191   -4.0302    0.0000 C   0  0  0  0  0  0  0  0  0  0  0  0
   -6.7902   -4.0189    0.0000 O   0  0  0  0  0  0  0  0  0  0  0  0
   -8.2125   -4.8552    0.0000 O   0  0  0  0  0  0  0  0  0  0  0  0
   -6.0790   -3.6007    0.0000 N   0  0  0  0  0  0  0  0  0  0  0  0
   -4.6567   -2.7644    0.0000 O   0  0  0  0  0  0  0  0  0  0  0  0
   -6.6867   -0.5471    0.0000 C   0  0  0  0  0  0  0  0  0  0  0  0
   -7.4819   -0.7669    0.0000 O   0  0  0  0  0  0  0  0  0  0  0  0
   -6.4031    0.0987    0.0000 O   0  0  0  0  0  0  0  0  0  0  0  0
   -8.9237   -5.2734    0.0000 C   0  0  0  0  0  0  0  0  0  0  0  0
   -8.9171   -6.0984    0.0000 C   0  0  0  0  0  0  0  0  0  0  0  0
   -9.6283   -6.5165    0.0000 C   0  0  0  0  0  0  0  0  0  0  0  0
   -9.6217   -7.3415    0.0000 C   0  0  0  0  0  0  0  0  0  0  0  0
   -8.9040   -7.7483    0.0000 C   0  0  0  0  0  0  0  0  0  0  0  0
   -8.1929   -7.3301    0.0000 C   0  0  0  0  0  0  0  0  0  0  0  0
   -8.1994   -6.5052    0.0000 C   0  0  0  0  0  0  0  0  0  0  0  0
   -6.7856    1.1600    0.0000 C   0  0  0  0  0  0  0  0  0  0  0  0
   -7.5001    0.7475    0.0000 C   0  0  0  0  0  0  0  0  0  0  0  0
   -8.2146    1.1600    0.0000 C   0  0  0  0  0  0  0  0  0  0  0  0
   -8.9290    0.7475    0.0000 C   0  0  0  0  0  0  0  0  0  0  0  0
   -8.9290   -0.0775    0.0000 C   0  0  0  0  0  0  0  0  0  0  0  0
   -8.2146   -0.4900    0.0000 C   0  0  0  0  0  0  0  0  0  0  0  0
   -7.5001   -0.0775    0.0000 C   0  0  0  0  0  0  0  0  0  0  0  0
   -9.6435    1.1600    0.0000 C   0  0  0  0  0  0  0  0  0  0  0  0
  -10.3580    0.7475    0.0000 C   0  0  0  0  0  0  0  0  0  0  0  0
  -10.3580   -0.0775    0.0000 C   0  0  0  0  0  0  0  0  0  0  0  0
   -9.6435   -0.4900    0.0000 C   0  0  0  0  0  0  0  0  0  0  0  0
   -5.3613   -4.0075    0.0000 C   0  0  0  0  0  0  0  0  0  0  0  0
   -4.6501   -3.5893    0.0000 O   0  0  0  0  0  0  0  0  0  0  0  0
   -5.3547   -4.8325    0.0000 C   0  0  0  0  0  0  0  0  0  0  0  0
   -6.7836   -4.8439    0.0000 C   0  0  0  0  0  0  0  0  0  0  0  0
   -7.4948   -5.2620    0.0000 C   0  0  0  0  0  0  0  0  0  0  0  0
   -6.0659   -5.2507    0.0000 O   0  0  0  0  0  0  0  0  0  0  0  0
   -8.9434   -2.7985    0.0000 C   0  0  0  0  0  0  0  0  0  0  0  0
   -9.6611   -2.3917    0.0000 O   0  0  0  0  0  0  0  0  0  0  0  0
   -8.9368   -3.6234    0.0000 C   0  0  0  0  0  0  0  0  0  0  0  0
   -3.8598   -2.6654    0.0000 C   0  0  0  0  0  0  0  0  0  0  0  0
   -3.2765   -3.2488    0.0000 C   0  0  0  0  0  0  0  0  0  0  0  0
   -3.6463   -1.9067    0.0000 O   0  0  0  0  0  0  0  0  0  0  0  0
    0.2597    1.7897    0.0000 C   0  0  0  0  0  0  0  0  0  0  0  0
    1.0566    2.0032    0.0000 C   0  0  0  0  0  0  0  0  0  0  0  0
    0.0462    0.9928    0.0000 O   0  0  0  0  0  0  0  0  0  0  0  0
    4.6460    3.5979    0.0000 C   0  0  0  0  0  0  0  0  0  0  0  0
    5.3618    4.0080    0.0000 C   0  0  0  0  0  0  0  0  0  0  0  0
    6.0749    3.5931    0.0000 C   0  0  0  0  0  0  0  0  0  0  0  0
    6.7907    4.0032    0.0000 C   0  0  0  0  0  0  0  0  0  0  0  0
    7.5038    3.5884    0.0000 C   0  0  0  0  0  0  0  0  0  0  0  0
    8.2197    3.9985    0.0000 C   0  0  0  0  0  0  0  0  0  0  0  0
    4.6432    2.7729    0.0000 O   0  0  0  0  0  0  0  0  0  0  0  0
    8.9328    3.5836    0.0000 N   0  0  0  0  0  0  0  0  0  0  0  0
    9.6454    3.9918    0.0000 N   0  3  0  0  0  0  0  0  0  0  0  0
   10.3580    4.4001    0.0000 N   0  5  0  0  0  0  0  0  0  0  0  0
109110  2  0      
108109  2  0      
106108  1  0      
  2  1  1  1      
  2  3  1  0      
  3  4  1  0      
  4  5  1  0      
  5  6  1  0      
  6  7  1  0      
  7  2  1  0      
  6  8  1  1      
  9  8  1  6      
  9 10  1  0      
 10 11  1  0      
 11 12  1  0      
 12 13  1  0      
 13 14  1  0      
 14  9  1  0      
 14 15  1  1      
 15 16  1  0      
  4 17  1  1      
  3 18  1  1      
  5 19  1  6      
 10 20  1  1      
 11 21  1  6      
 12 22  1  1      
 22 23  1  0      
 23 24  1  0      
 24 25  1  0      
 25 26  1  0      
 26 27  1  0      
 27 28  1  0      
 20 29  1  0      
 19 30  1  0      
 30 31  1  0      
 16 32  1  0      
 32 33  1  0      
 33 34  2  0      
 34 35  1  0      
 35 36  2  0      
 36 37  1  0      
 37 38  2  0      
 38 33  1  0      
 29 39  1  0      
 39 40  2  0      
 40 41  1  0      
 41 42  2  0      
 42 43  1  0      
 43 44  2  0      
 44 39  1  0      
 31 45  2  0      
 45 46  1  0      
 46 47  2  0      
 47 48  1  0      
 48 49  2  0      
 49 31  1  0      
  1 50  1  0      
 51 52  1  0      
 52 53  1  0      
 53 54  1  0      
 54 55  1  0      
 55 56  1  0      
 51 56  1  6      
 51 57  1  0      
 57 58  1  0      
 57 59  1  1      
 58 61  1  6      
 60 62  1  0      
 52 63  1  1      
 53 64  1  6      
 55 65  1  1      
 65 66  2  0      
 65 67  1  0      
 62 68  1  0      
 68 69  1  0      
 69 70  2  0      
 70 71  1  0      
 71 72  2  0      
 72 73  1  0      
 73 74  2  0      
 74 69  1  0      
 55 17  1  6      
 60 58  1  0      
 18 75  1  0      
 50 75  1  0      
 75 76  1  1      
 76 77  2  0      
 77 78  1  0      
 78 79  2  0      
 79 80  1  0      
 80 81  2  0      
 81 76  1  0      
 78 82  1  0      
 82 83  2  0      
 83 84  1  0      
 84 85  2  0      
 85 79  1  0      
 63 86  1  0      
 86 87  2  0      
 86 88  1  0      
 61 89  1  0      
 89 90  1  0      
 89 91  2  0      
 59 92  1  0      
 92 93  2  0      
 92 94  1  0      
 64 95  1  0      
 95 96  1  0      
 95 97  2  0      
 21 98  1  0      
 98 99  1  0      
 98100  2  0      
 28101  1  0      
101102  1  0      
102103  1  0      
103104  1  0      
104105  1  0      
105106  1  0      
101107  2  0      
M  CHG  2 109   1 110  -1
M  STY  1   1 SUP
M  SLB  1   1   1
M  SAL   1  3 108 109 110
M  SBL   1  1   3
M  SMT   1 N3
M  SBV   1   3   -0.7131    0.4149
M  END
